# Supplementary material for: Use of esophageal balloon pressure-volume curve analysis to determine esophageal wall elastance and calibrate raw esophageal pressure: a bench experiment and clinical study
Source: Springer Nature journal article supplement (doi:10.1186/s12871-018-0488-6), 2018-02-14
Supplement: MOESM2 [file 15465930]

**Use of esophageal balloon pressure-volume curve analysis to determine esophageal wall elastance and calibrate raw  
esophageal pressure: a bench experiment and clinical study**

Xiu-Mei Sun, Guang-Qiang Chen, Hua-Wei Huang, Xuan He, Yan-Lin Yang, Zhong-Hua Shi, Ming Xu, Jian-Xin Zhou

**Additional file 2: Detailed results in the bench experiment**

Balloon volume tests were performed at atmospheric pressure and in chambers with different inner volumes at different baseline pressures. The balloon was intermittently inflated in 0.2-ml increment up to 2.4 ml. Balloon pressure and chamber pressure were simultaneously measured. Balloon transmural pressure was defined as the difference between the balloon pressure and the chamber pressure (balloon pressure - chamber pressure). Balloon transmural pressure at atmospheric pressure was equal to the balloon pressure. The balloon volume range with transmural pressure within  $\pm 1.0$  cmH<sub>2</sub>O was defined as the optimal balloon volume, which represented the filling volume with minimal influence of balloon recoil pressure.

**Catheter No 1**

|                                           |                                       | Balloon volume (ml) |        |        |        |        |        |        |        |        |        |        |        |        |  |
|-------------------------------------------|---------------------------------------|---------------------|--------|--------|--------|--------|--------|--------|--------|--------|--------|--------|--------|--------|--|
|                                           |                                       | 0                   | 0.2    | 0.4    | 0.6    | 0.8    | 1      | 1.2    | 1.4    | 1.6    | 1.8    | 2      | 2.2    | 2.4    |  |
| At atmosphere                             | Balloon pressure (cmH <sub>2</sub> O) | -3.064              | -0.337 | -0.041 | 0.057  | 0.080  | 0.096  | 0.126  | 0.156  | 0.190  | 0.319  | 0.651  | 1.493  | 5.698  |  |
| Chamber inner volume = 1000 ml            |                                       |                     |        |        |        |        |        |        |        |        |        |        |        |        |  |
| Baseline pressure = 5 cmH <sub>2</sub> O  | Chamber pressure (cmH <sub>2</sub> O) | 5.054               | 5.216  | 5.418  | 5.628  | 5.839  | 6.003  | 6.222  | 6.429  | 6.639  | 6.854  | 7.083  | 7.303  | 7.487  |  |
|                                           | Balloon pressure (cmH <sub>2</sub> O) | 0.415               | 4.997  | 5.378  | 5.637  | 5.894  | 6.094  | 6.356  | 6.616  | 6.911  | 7.299  | 7.935  | 9.087  | 12.349 |  |
| Baseline pressure = 10 cmH <sub>2</sub> O | Chamber pressure (cmH <sub>2</sub> O) | 9.861               | 10.011 | 10.208 | 10.436 | 10.628 | 10.856 | 11.046 | 11.274 | 11.497 | 11.710 | 11.913 | 12.109 | 12.290 |  |
|                                           | Balloon pressure (cmH <sub>2</sub> O) | 1.341               | 9.761  | 10.202 | 10.467 | 10.686 | 10.955 | 11.179 | 11.453 | 11.749 | 12.085 | 12.529 | 13.325 | 15.165 |  |
| Baseline pressure = 15 cmH <sub>2</sub> O | Chamber pressure (cmH <sub>2</sub> O) | 14.944              | 15.088 | 15.314 | 15.554 | 15.804 | 16.011 | 16.245 | 16.505 | 16.748 | 16.977 | 17.169 | 17.400 | 17.618 |  |
|                                           | Balloon pressure (cmH <sub>2</sub> O) | 6.546               | 14.792 | 15.297 | 15.585 | 15.869 | 16.131 | 16.410 | 16.724 | 17.037 | 17.399 | 17.835 | 18.631 | 20.231 |  |
| Baseline pressure = 20 cmH <sub>2</sub> O | Chamber pressure (cmH <sub>2</sub> O) | 19.947              | 20.065 | 20.084 | 20.484 | 20.697 | 20.920 | 21.130 | 21.337 | 21.567 | 21.779 | 21.978 | 22.180 | 22.393 |  |
|                                           | Balloon pressure (cmH <sub>2</sub> O) | 6.617               | 19.543 | 20.301 | 20.547 | 20.801 | 21.051 | 21.304 | 21.547 | 21.828 | 22.124 | 22.450 | 22.993 | 23.866 |  |
| Baseline pressure = 25 cmH <sub>2</sub> O | Chamber pressure (cmH <sub>2</sub> O) | 24.919              | 24.955 | 25.105 | 25.307 | 25.497 | 25.692 | 25.869 | 26.065 | 26.220 | 26.416 | 26.609 | 26.777 | 26.938 |  |
|                                           | Balloon pressure (cmH <sub>2</sub> O) | 1.572               | 23.124 | 24.983 | 25.339 | 25.584 | 25.816 | 26.015 | 26.229 | 26.407 | 26.633 | 26.906 | 27.246 | 27.752 |  |
| Baseline pressure = 30 cmH <sub>2</sub> O | Chamber pressure (cmH <sub>2</sub> O) | 29.933              | 29.986 | 30.149 | 30.346 | 30.529 | 30.723 | 30.912 | 31.113 | 31.304 | 31.490 | 31.666 | 31.846 | 32.042 |  |
|                                           | Balloon pressure (cmH <sub>2</sub> O) | 9.270               | 28.681 | 30.041 | 30.393 | 30.664 | 30.884 | 31.090 | 31.315 | 31.526 | 31.762 | 32.007 | 32.420 | 33.054 |  |

**Catheter No 2**

|                                           |                                       | Balloon volume (ml) |        |        |        |        |        |        |        |        |        |        |        |        |  |
|-------------------------------------------|---------------------------------------|---------------------|--------|--------|--------|--------|--------|--------|--------|--------|--------|--------|--------|--------|--|
|                                           |                                       | 0                   | 0.2    | 0.4    | 0.6    | 0.8    | 1      | 1.2    | 1.4    | 1.6    | 1.8    | 2      | 2.2    | 2.4    |  |
| At atmosphere                             | Balloon pressure (cmH <sub>2</sub> O) | -2.978              | -0.205 | -0.014 | 0.047  | 0.073  | 0.084  | 0.092  | 0.127  | 0.182  | 0.332  | 0.624  | 1.447  | 6.709  |  |
| Chamber inner volume = 500 ml             |                                       |                     |        |        |        |        |        |        |        |        |        |        |        |        |  |
| Baseline pressure = 5 cmH <sub>2</sub> O  | Chamber pressure (cmH <sub>2</sub> O) | 4.944               | 5.271  | 5.643  | 6.047  | 6.418  | 6.799  | 7.165  | 7.583  | 7.924  | 8.215  | 8.574  | 8.932  | 9.241  |  |
|                                           | Balloon pressure (cmH <sub>2</sub> O) | 1.629               | 5.071  | 5.618  | 6.159  | 6.562  | 6.973  | 7.370  | 7.827  | 8.253  | 8.674  | 9.368  | 10.598 | 12.861 |  |
| Baseline pressure = 10 cmH <sub>2</sub> O | Chamber pressure (cmH <sub>2</sub> O) | 10.054              | 10.349 | 10.756 | 11.143 | 11.547 | 11.954 | 12.363 | 12.811 | 13.239 | 13.648 | 14.016 | 14.367 | 14.739 |  |
|                                           | Balloon pressure (cmH <sub>2</sub> O) | 2.387               | 9.998  | 10.782 | 11.270 | 11.714 | 12.158 | 12.600 | 13.074 | 13.568 | 14.095 | 14.711 | 15.683 | 17.756 |  |
| Baseline pressure = 15 cmH <sub>2</sub> O | Chamber pressure (cmH <sub>2</sub> O) | 15.010              | 15.231 | 15.648 | 16.057 | 16.449 | 16.867 | 17.264 | 17.647 | 18.062 | 18.470 | 18.882 | 19.274 | 19.635 |  |
|                                           | Balloon pressure (cmH <sub>2</sub> O) | 4.572               | 14.801 | 15.681 | 16.209 | 16.640 | 17.092 | 17.512 | 17.912 | 18.378 | 18.931 | 19.633 | 20.834 | 23.388 |  |
| Baseline pressure = 20 cmH <sub>2</sub> O | Chamber pressure (cmH <sub>2</sub> O) | 19.996              | 20.179 | 20.570 | 20.976 | 21.386 | 21.776 | 22.157 | 22.556 | 22.909 | 23.184 | 23.542 | 23.937 | 24.303 |  |
|                                           | Balloon pressure (cmH <sub>2</sub> O) | 5.098               | 19.474 | 20.585 | 21.119 | 21.574 | 21.994 | 22.400 | 22.829 | 23.216 | 23.552 | 24.002 | 24.713 | 25.921 |  |
| Baseline pressure = 25 cmH <sub>2</sub> O | Chamber pressure (cmH <sub>2</sub> O) | 24.939              | 25.028 | 25.420 | 25.807 | 26.193 | 26.586 | 26.986 | 27.396 | 27.802 | 28.206 | 28.596 | 29.009 | 29.387 |  |
|                                           | Balloon pressure (cmH <sub>2</sub> O) | 4.728               | 23.218 | 25.413 | 25.958 | 26.406 | 26.837 | 27.263 | 27.696 | 28.124 | 28.583 | 29.100 | 29.823 | 30.949 |  |
| Baseline pressure = 30 cmH <sub>2</sub> O | Chamber pressure (cmH <sub>2</sub> O) | 30.276              | 30.354 | 30.616 | 30.868 | 31.139 | 31.418 | 31.769 | 32.145 | 32.552 | 32.936 | 33.349 | 33.728 | 34.107 |  |
|                                           | Balloon pressure (cmH <sub>2</sub> O) | 6.889               | 26.475 | 30.071 | 30.683 | 31.110 | 31.482 | 31.872 | 32.285 | 32.728 | 33.154 | 33.602 | 34.063 | 34.633 |  |

**Catheter No 3**

|                                           |                                       | Balloon volume (ml) |        |        |        |        |        |        |        |        |        |        |        |        |  |
|-------------------------------------------|---------------------------------------|---------------------|--------|--------|--------|--------|--------|--------|--------|--------|--------|--------|--------|--------|--|
|                                           |                                       | 0                   | 0.2    | 0.4    | 0.6    | 0.8    | 1      | 1.2    | 1.4    | 1.6    | 1.8    | 2      | 2.2    | 2.4    |  |
| At atmosphere                             | Balloon pressure (cmH <sub>2</sub> O) | -3.053              | -0.374 | -0.090 | 0.003  | 0.033  | 0.054  | 0.060  | 0.077  | 0.135  | 0.269  | 0.590  | 1.436  | 7.302  |  |
| Chamber inner volume = 250 ml             |                                       |                     |        |        |        |        |        |        |        |        |        |        |        |        |  |
| Baseline pressure = 5 cmH <sub>2</sub> O  | Chamber pressure (cmH <sub>2</sub> O) | 4.937               | 5.623  | 6.439  | 7.321  | 8.162  | 9.017  | 9.849  | 10.708 | 11.550 | 12.389 | 13.209 | 14.019 | 14.765 |  |
|                                           | Balloon pressure (cmH <sub>2</sub> O) | 1.352               | 5.483  | 6.532  | 7.581  | 8.531  | 9.446  | 10.310 | 11.146 | 12.059 | 13.011 | 14.207 | 15.934 | 18.974 |  |
| Baseline pressure = 10 cmH <sub>2</sub> O | Chamber pressure (cmH <sub>2</sub> O) | 10.053              | 10.682 | 11.547 | 12.384 | 13.254 | 14.106 | 14.943 | 15.793 | 16.627 | 17.462 | 18.285 | 19.103 | 19.858 |  |
|                                           | Balloon pressure (cmH <sub>2</sub> O) | 1.502               | 10.290 | 11.637 | 12.526 | 13.427 | 14.304 | 15.204 | 16.094 | 17.000 | 17.929 | 18.970 | 20.204 | 21.970 |  |
| Baseline pressure = 15 cmH <sub>2</sub> O | Chamber pressure (cmH <sub>2</sub> O) | 14.917              | 15.420 | 16.220 | 17.090 | 17.946 | 18.796 | 19.646 | 20.508 | 21.349 | 22.204 | 23.025 | 23.858 | 24.627 |  |
|                                           | Balloon pressure (cmH <sub>2</sub> O) | 4.085               | 14.837 | 16.260 | 17.228 | 18.132 | 19.033 | 19.947 | 20.865 | 21.747 | 22.681 | 23.661 | 24.812 | 26.368 |  |
| Baseline pressure = 20 cmH <sub>2</sub> O | Chamber pressure (cmH <sub>2</sub> O) | 20.003              | 20.485 | 21.201 | 21.986 | 22.785 | 23.599 | 24.382 | 25.193 | 25.994 | 26.812 | 27.627 | 28.435 | 29.206 |  |
|                                           | Balloon pressure (cmH <sub>2</sub> O) | 8.543               | 19.602 | 21.137 | 22.022 | 22.866 | 23.688 | 24.557 | 25.416 | 26.284 | 27.198 | 28.162 | 29.239 | 30.609 |  |
| Baseline pressure = 25 cmH <sub>2</sub> O | Chamber pressure (cmH <sub>2</sub> O) | 25.000              | 25.315 | 26.130 | 26.974 | 27.771 | 28.560 | 29.335 | 30.145 | 30.924 | 31.712 | 32.471 | 33.241 | 33.994 |  |
|                                           | Balloon pressure (cmH <sub>2</sub> O) | 8.400               | 24.527 | 26.277 | 27.161 | 27.996 | 28.813 | 29.639 | 30.471 | 31.309 | 32.172 | 33.025 | 33.982 | 35.117 |  |
| Baseline pressure = 30 cmH <sub>2</sub> O | Chamber pressure (cmH <sub>2</sub> O) | 29.975              | 30.184 | 30.918 | 31.700 | 32.477 | 33.281 | 34.102 | 34.918 | 35.775 | 36.544 | 37.331 | 38.109 | 38.889 |  |
|                                           | Balloon pressure (cmH <sub>2</sub> O) | 8.453               | 28.045 | 31.044 | 31.918 | 32.728 | 33.537 | 34.398 | 35.238 | 36.145 | 36.975 | 37.846 | 38.766 | 39.498 |  |

**Catheter No 4**

|                                           |                                       | Balloon volume (ml) |        |        |        |        |        |        |        |        |        |        |        |        |  |
|-------------------------------------------|---------------------------------------|---------------------|--------|--------|--------|--------|--------|--------|--------|--------|--------|--------|--------|--------|--|
|                                           |                                       | 0                   | 0.2    | 0.4    | 0.6    | 0.8    | 1      | 1.2    | 1.4    | 1.6    | 1.8    | 2      | 2.2    | 2.4    |  |
| At atmosphere                             | Balloon pressure (cmH <sub>2</sub> O) | -3.006              | -0.168 | 0.001  | 0.037  | 0.056  | 0.059  | 0.077  | 0.102  | 0.171  | 0.344  | 0.653  | 1.883  | 9.501  |  |
| Chamber inner volume = 175 ml             |                                       |                     |        |        |        |        |        |        |        |        |        |        |        |        |  |
| Baseline pressure = 5 cmH <sub>2</sub> O  | Chamber pressure (cmH <sub>2</sub> O) | 5.004               | 6.040  | 7.209  | 8.405  | 9.603  | 10.787 | 11.974 | 13.169 | 14.365 | 15.515 | 16.660 | 17.814 | 18.828 |  |
|                                           | Balloon pressure (cmH <sub>2</sub> O) | 0.852               | 5.558  | 7.093  | 8.416  | 9.734  | 10.992 | 12.271 | 13.499 | 14.741 | 16.021 | 17.453 | 19.360 | 22.292 |  |
| Baseline pressure = 10 cmH <sub>2</sub> O | Chamber pressure (cmH <sub>2</sub> O) | 9.974               | 10.906 | 12.132 | 13.275 | 14.475 | 15.666 | 16.856 | 18.059 | 19.234 | 20.445 | 21.619 | 22.742 | 23.797 |  |
|                                           | Balloon pressure (cmH <sub>2</sub> O) | 2.370               | 10.320 | 12.032 | 13.309 | 14.593 | 15.869 | 17.125 | 18.351 | 19.573 | 20.900 | 22.330 | 24.012 | 26.595 |  |
| Baseline pressure = 15 cmH <sub>2</sub> O | Chamber pressure (cmH <sub>2</sub> O) | 15.023              | 15.727 | 16.819 | 18.005 | 19.120 | 20.284 | 21.445 | 22.607 | 23.738 | 24.875 | 26.017 | 27.008 | 27.896 |  |
|                                           | Balloon pressure (cmH <sub>2</sub> O) | 2.739               | 14.987 | 16.635 | 18.013 | 19.217 | 20.467 | 21.697 | 22.906 | 24.073 | 25.312 | 26.605 | 27.933 | 29.357 |  |
| Baseline pressure = 20 cmH <sub>2</sub> O | Chamber pressure (cmH <sub>2</sub> O) | 19.973              | 20.525 | 21.635 | 22.797 | 23.943 | 25.121 | 26.281 | 27.440 | 28.750 | 29.424 | 30.434 | 31.344 | 32.517 |  |
|                                           | Balloon pressure (cmH <sub>2</sub> O) | 4.236               | 18.268 | 21.463 | 22.795 | 24.063 | 25.352 | 26.569 | 27.775 | 28.956 | 29.810 | 30.912 | 31.952 | 33.473 |  |
| Baseline pressure = 25 cmH <sub>2</sub> O | Chamber pressure (cmH <sub>2</sub> O) | 25.007              | 25.242 | 25.887 | 27.041 | 28.211 | 29.370 | 30.499 | 31.621 | 32.724 | 33.848 | 34.919 | 36.058 | 36.442 |  |
|                                           | Balloon pressure (cmH <sub>2</sub> O) | 5.664               | 22.088 | 25.468 | 26.957 | 28.242 | 29.490 | 30.713 | 31.928 | 33.082 | 34.246 | 35.403 | 36.715 | 37.718 |  |
| Baseline pressure = 30 cmH <sub>2</sub> O | Chamber pressure (cmH <sub>2</sub> O) | 30.056              | 30.281 | 30.918 | 32.288 | 33.352 | 34.435 | 35.542 | 36.584 | 37.663 | 38.754 | 39.844 | 40.912 | 41.922 |  |
|                                           | Balloon pressure (cmH <sub>2</sub> O) | 7.406               | 27.467 | 31.044 | 32.350 | 33.529 | 34.697 | 35.928 | 37.067 | 38.210 | 39.352 | 40.537 | 41.582 | 42.909 |  |

**Catheter No 5**

|                                           |                                       | Balloon volume (ml) |        |        |        |        |        |        |        |        |        |        |        |        |  |
|-------------------------------------------|---------------------------------------|---------------------|--------|--------|--------|--------|--------|--------|--------|--------|--------|--------|--------|--------|--|
|                                           |                                       | 0                   | 0.2    | 0.4    | 0.6    | 0.8    | 1      | 1.2    | 1.4    | 1.6    | 1.8    | 2      | 2.2    | 2.4    |  |
| At atmosphere                             | Balloon pressure (cmH <sub>2</sub> O) | -3.089              | -0.251 | -0.046 | 0.009  | 0.034  | 0.048  | 0.078  | 0.097  | 0.138  | 0.300  | 0.641  | 1.825  | 9.271  |  |
| Chamber inner volume = 125 ml             |                                       |                     |        |        |        |        |        |        |        |        |        |        |        |        |  |
| Baseline pressure = 5 cmH <sub>2</sub> O  | Chamber pressure (cmH <sub>2</sub> O) | 4.963               | 6.447  | 8.132  | 9.784  | 11.514 | 13.213 | 14.851 | 16.469 | 18.060 | 19.674 | 21.276 | 22.840 | 24.331 |  |
|                                           | Balloon pressure (cmH <sub>2</sub> O) | 0.443               | 6.128  | 8.248  | 10.082 | 11.872 | 13.555 | 15.302 | 17.167 | 19.008 | 20.999 | 23.283 | 25.872 | 29.123 |  |
| Baseline pressure = 10 cmH <sub>2</sub> O | Chamber pressure (cmH <sub>2</sub> O) | 10.063              | 11.208 | 12.844 | 14.442 | 16.109 | 17.758 | 19.418 | 21.032 | 22.637 | 24.303 | 25.929 | 27.505 | 28.982 |  |
|                                           | Balloon pressure (cmH <sub>2</sub> O) | 0.575               | 10.947 | 12.973 | 14.696 | 16.461 | 18.084 | 19.755 | 21.486 | 23.309 | 25.211 | 27.264 | 29.447 | 31.852 |  |
| Baseline pressure = 15 cmH <sub>2</sub> O | Chamber pressure (cmH <sub>2</sub> O) | 15.008              | 15.884 | 17.494 | 19.206 | 20.855 | 22.518 | 24.142 | 25.749 | 27.365 | 29.032 | 30.622 | 32.190 | 33.742 |  |
|                                           | Balloon pressure (cmH <sub>2</sub> O) | 1.900               | 15.450 | 17.611 | 19.474 | 21.211 | 22.869 | 24.484 | 26.195 | 27.963 | 29.914 | 31.904 | 34.074 | 36.463 |  |
| Baseline pressure = 20 cmH <sub>2</sub> O | Chamber pressure (cmH <sub>2</sub> O) | 20.008              | 20.692 | 22.266 | 23.831 | 25.466 | 27.048 | 28.688 | 30.242 | 31.791 | 33.312 | 34.932 | 36.458 | 37.949 |  |
|                                           | Balloon pressure (cmH <sub>2</sub> O) | 3.624               | 19.946 | 22.353 | 24.079 | 25.827 | 27.432 | 29.057 | 30.717 | 32.363 | 34.096 | 35.963 | 38.054 | 40.346 |  |
| Baseline pressure = 25 cmH <sub>2</sub> O | Chamber pressure (cmH <sub>2</sub> O) | 25.031              | 25.586 | 27.105 | 28.708 | 30.325 | 31.889 | 33.484 | 35.060 | 36.292 | 37.865 | 39.447 | 40.988 | 42.493 |  |
|                                           | Balloon pressure (cmH <sub>2</sub> O) | 5.472               | 23.504 | 27.103 | 28.947 | 30.699 | 32.317 | 33.839 | 35.454 | 36.754 | 38.506 | 40.356 | 42.262 | 44.153 |  |
| Baseline pressure = 30 cmH <sub>2</sub> O | Chamber pressure (cmH <sub>2</sub> O) | 29.865              | 30.306 | 31.707 | 33.324 | 34.925 | 36.571 | 38.132 | 39.718 | 41.309 | 42.448 | 43.973 | 45.506 | 47.010 |  |
|                                           | Balloon pressure (cmH <sub>2</sub> O) | 6.840               | 26.794 | 31.574 | 33.522 | 35.279 | 36.996 | 38.536 | 40.126 | 41.830 | 43.055 | 44.828 | 46.644 | 48.591 |  |
