# Supplementary material for: Use of esophageal balloon pressure-volume curve analysis to determine esophageal wall elastance and calibrate raw esophageal pressure: a bench experiment and clinical study
Source: Springer Nature journal article supplement (doi:10.1186/s12871-018-0488-6), 2018-02-14
Supplement: MOESM3 [file 15465930]

**Use of esophageal balloon pressure-volume curve analysis to  
determine esophageal wall elastance and calibrate raw esophageal  
pressure: a bench experiment and clinical study**

Xiu-Mei Sun, Guang-Qiang Chen, Hua-Wei Huang, Xuan He, Yan-Lin Yang,

Zhong-Hua Shi, Ming Xu, Jian-Xin Zhou

**Additional file 3: Figure S1**

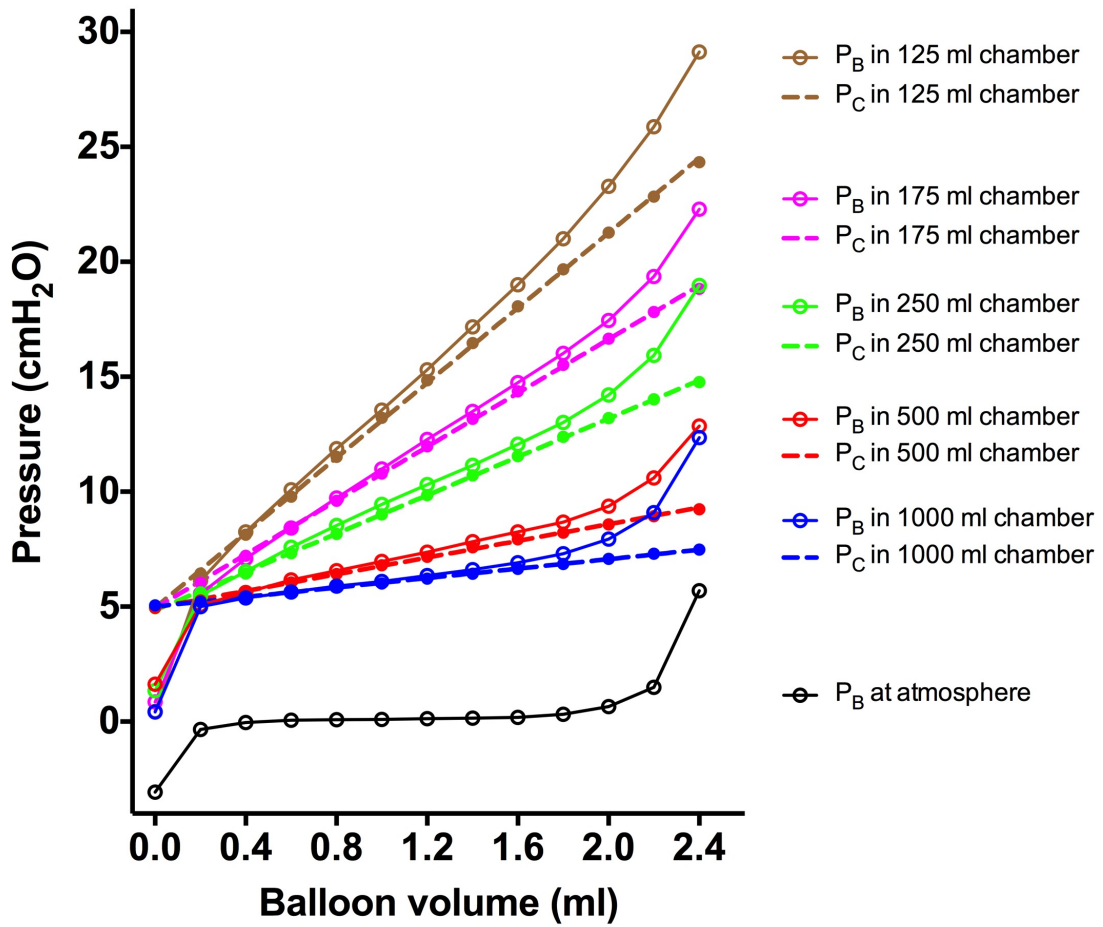

**Figure S1.** Pressure-volume curves at the atmosphere and in chambers with five different inner volumes at baseline chamber pressure of 5 cmH<sub>2</sub>O. Balloon pressure ( $P_B$ ) is shown as circle and solid line, and chamber pressure ( $P_C$ ) as dot and dash line. Slope of intermediate linear section increased as chamber volume decreased corresponding to increased chamber elastance.
