# Supplementary material for: Use of esophageal balloon pressure-volume curve analysis to determine esophageal wall elastance and calibrate raw esophageal pressure: a bench experiment and clinical study
Source: Springer Nature journal article supplement (doi:10.1186/s12871-018-0488-6), 2018-02-14
Supplement: MOESM4 [file 15465930]

**Use of esophageal balloon pressure-volume curve analysis to  
determine esophageal wall elastance and calibrate raw esophageal  
pressure: a bench experiment and clinical study**

Xiu-Mei Sun, Guang-Qiang Chen, Hua-Wei Huang, Xuan He, Yan-Lin Yang,

Zhong-Hua Shi, Ming Xu, Jian-Xin Zhou

**Additional file 4: Table S1**

**Table S1** Measured chamber elastance (cmH<sub>2</sub>O/ml) in chambers with different inner volumes<sup>a</sup>

| Baseline<br>chamber pressure | Chamber inner volume |                  |                  |                  |                  |
|------------------------------|----------------------|------------------|------------------|------------------|------------------|
|                              | 1000 ml              | 500 ml           | 250 ml           | 175 ml           | 125 ml           |
| 5 cmH <sub>2</sub> O         | 1.0                  | 1.8              | 4.2              | 5.8              | 8.2              |
| 10 cmH <sub>2</sub> O        | 1.0                  | 2.0              | 4.2              | 5.9              | 8.1              |
| 15 cmH <sub>2</sub> O        | 1.1                  | 2.0              | 4.2              | 5.6              | 8.0              |
| 20 cmH <sub>2</sub> O        | 1.1                  | 1.8              | 3.9              | 5.4              | 7.6              |
| 25 cmH <sub>2</sub> O        | 0.9                  | 1.9              | 3.9              | 5.2              | 7.5              |
| 30 cmH <sub>2</sub> O        | 0.9                  | 1.7              | 3.9              | 5.2              | 7.5              |
| Median (IQR)                 | 1.0<br>(0.9–1.1)     | 1.9<br>(1.8–2.0) | 4.1<br>(3.9–4.2) | 5.5<br>(5.2–5.8) | 7.8<br>(7.5–8.1) |

IQR: interquartile range.

<sup>a</sup>Chamber elastance was measured as the slope of least square fitting between the chamber pressure and balloon volume. Coefficient of determination in least square fitting ranged from 0.987 to > 0.999.
