# Supplementary material for: Use of esophageal balloon pressure-volume curve analysis to determine esophageal wall elastance and calibrate raw esophageal pressure: a bench experiment and clinical study
Source: Springer Nature journal article supplement (doi:10.1186/s12871-018-0488-6), 2018-02-14
Supplement: MOESM5 [file 15465930]

**Use of esophageal balloon pressure-volume curve analysis to determine esophageal wall elastance and calibrate raw  
esophageal pressure: a bench experiment and clinical study**

Xiu-Mei Sun, Guang-Qiang Chen, Hua-Wei Huang, Xuan He, Yan-Lin Yang, Zhong-Hua Shi, Ming Xu, Jian-Xin Zhou

**Additional file 5: Detailed results in the clinical study**

Balloon volume tests were performed in 40 passive patients under volume-controlled ventilation. The balloon was intermittently inflated in 0.2-ml increment up to 2.4 ml. In some patients, the test was stopped when the balloon was inflated by 1.8 to 2.2 ml because of marked elevation of esophageal balloon pressure. At each tested balloon volume, after 3-min equilibration, airway was occluded at end-expiration and end-inspiration each for 3 s, and esophageal balloon pressure (Pes at EEO and Pes at EIO) was measured. Positive pressure occlusion test was performed at end-expiratory occlusion, and the ratio of changes in esophageal pressure to airway pressure ( $\Delta P_{es}/\Delta P_{aw}$ ) during the compression of the chest wall was calculated.

| Patient No | Parameters                      | Balloon volume (ml) |        |        |        |        |        |        |        |        |        |        |        |        |
|------------|---------------------------------|---------------------|--------|--------|--------|--------|--------|--------|--------|--------|--------|--------|--------|--------|
|            |                                 | 0.0                 | 0.2    | 0.4    | 0.6    | 0.8    | 1.0    | 1.2    | 1.4    | 1.6    | 1.8    | 2.0    | 2.2    | 2.4    |
| 1          | Pes at EEO (cmH <sub>2</sub> O) | 1.209               | 7.205  | 8.282  | 8.994  | 9.515  | 10.477 | 11.053 | 11.841 | 13.203 | 15.635 | 25.547 | 40.700 |        |
|            | Pes at EIO (cmH <sub>2</sub> O) | 1.541               | 9.531  | 10.816 | 11.771 | 13.129 | 14.919 | 15.945 | 17.156 | 18.307 | 19.781 | 26.943 | 41.036 |        |
|            | ΔPes/ΔPaw ratio                 | 0.029               | 0.506  | 0.600  | 0.676  | 0.813  | 0.869  | 0.952  | 0.929  | 0.886  | 0.788  | 0.341  | 0.212  |        |
| 2          | Pes at EEO (cmH <sub>2</sub> O) | -0.417              | 11.713 | 12.598 | 12.945 | 13.554 | 14.658 | 15.605 | 17.619 | 19.816 | 22.904 | 27.321 |        |        |
|            | Pes at EIO (cmH <sub>2</sub> O) | -0.331              | 13.381 | 14.456 | 14.909 | 15.211 | 15.951 | 17.175 | 18.862 | 20.779 | 23.910 | 27.691 |        |        |
|            | ΔPes/ΔPaw ratio                 | 0.050               | 1.124  | 1.119  | 1.164  | 1.092  | 0.988  | 1.088  | 1.094  | 1.156  | 1.074  | 1.034  |        |        |
| 3          | Pes at EEO (cmH <sub>2</sub> O) | -0.040              | 5.873  | 6.391  | 6.525  | 7.295  | 7.880  | 8.733  | 9.622  | 10.900 | 14.678 | 32.651 | 42.212 |        |
|            | Pes at EIO (cmH <sub>2</sub> O) | 0.405               | 7.338  | 8.056  | 9.222  | 9.729  | 10.782 | 11.969 | 13.015 | 13.970 | 16.551 | 26.816 | 41.798 |        |
|            | ΔPes/ΔPaw ratio                 | 0.079               | 0.539  | 0.553  | 0.592  | 0.784  | 0.849  | 0.867  | 0.877  | 0.846  | 0.692  | 0.283  | 0.139  |        |
| 4          | Pes at EEO (cmH <sub>2</sub> O) | 1.670               | 9.820  | 10.631 | 11.108 | 11.502 | 11.933 | 11.937 | 12.454 | 12.467 | 15.916 | 27.321 |        |        |
|            | Pes at EIO (cmH <sub>2</sub> O) | 1.851               | 11.425 | 12.904 | 14.539 | 15.462 | 16.107 | 16.951 | 18.202 | 18.282 | 20.676 | 27.691 |        |        |
|            | ΔPes/ΔPaw ratio                 | 0.047               | 0.523  | 0.840  | 0.817  | 0.788  | 0.865  | 0.886  | 0.803  | 0.854  | 1.131  | 0.734  |        |        |
| 5          | Pes at EEO (cmH <sub>2</sub> O) | -0.079              | 1.929  | 3.044  | 4.255  | 4.219  | 4.750  | 5.536  | 6.894  | 8.154  | 11.388 | 14.954 | 21.654 | 34.734 |
|            | Pes at EIO (cmH <sub>2</sub> O) | 2.091               | 7.669  | 8.331  | 9.036  | 9.234  | 9.877  | 10.126 | 10.882 | 12.403 | 14.566 | 16.401 | 23.680 | 35.059 |
|            | ΔPes/ΔPaw ratio                 | 0.082               | 0.879  | 0.847  | 1.069  | 1.023  | 0.964  | 0.918  | 0.867  | 0.785  | 0.796  | 0.318  | 0.212  | 0.043  |
| 6          | Pes at EEO (cmH <sub>2</sub> O) | 0.063               | 5.125  | 6.213  | 6.903  | 7.704  | 7.692  | 9.322  | 10.777 | 11.635 | 13.765 | 14.482 | 20.762 | 32.697 |
|            | Pes at EIO (cmH <sub>2</sub> O) | 0.767               | 9.513  | 10.372 | 11.179 | 11.342 | 11.272 | 12.403 | 13.828 | 14.227 | 16.540 | 17.635 | 22.598 | 33.334 |
|            | ΔPes/ΔPaw ratio                 | 0.156               | 1.156  | 1.169  | 1.097  | 1.220  | 1.002  | 1.194  | 1.159  | 1.227  | 1.148  | 1.133  | 1.203  | 0.224  |
| 7          | Pes at EEO (cmH <sub>2</sub> O) | 0.500               | 7.730  | 8.445  | 8.814  | 8.928  | 9.499  | 10.005 | 11.059 | 11.610 | 12.934 | 17.784 | 24.480 | 37.459 |
|            | Pes at EIO (cmH <sub>2</sub> O) | 1.005               | 10.253 | 11.261 | 11.717 | 11.782 | 12.444 | 12.764 | 13.917 | 13.921 | 15.542 | 20.050 | 26.387 | 38.251 |
|            | ΔPes/ΔPaw ratio                 | 0.136               | 0.947  | 1.023  | 0.990  | 1.175  | 1.180  | 1.181  | 1.189  | 1.162  | 1.166  | 0.966  | 0.804  | 0.325  |
| 8          | Pes at EEO (cmH <sub>2</sub> O) | 0.284               | 3.310  | 3.704  | 3.855  | 4.164  | 4.504  | 4.752  | 5.431  | 5.935  | 6.974  | 9.312  | 17.775 | 32.200 |
|            | Pes at EIO (cmH <sub>2</sub> O) | 1.527               | 5.533  | 6.103  | 6.497  | 7.051  | 7.647  | 8.091  | 8.730  | 9.344  | 10.033 | 11.786 | 18.756 | 32.482 |
|            | ΔPes/ΔPaw ratio                 | 0.317               | 0.825  | 0.935  | 0.991  | 1.032  | 0.978  | 0.964  | 1.044  | 1.038  | 1.095  | 0.966  | 0.711  | 0.289  |
| 9          | Pes at EEO (cmH <sub>2</sub> O) | 0.030               | 1.587  | 2.253  | 2.691  | 3.156  | 3.623  | 4.236  | 5.354  | 6.462  | 8.080  | 12.363 | 21.219 | 34.217 |
|            | Pes at EIO (cmH <sub>2</sub> O) | 2.177               | 4.278  | 5.294  | 5.999  | 6.511  | 6.795  | 7.196  | 7.738  | 8.552  | 9.954  | 13.256 | 20.946 | 34.019 |
|            | ΔPes/ΔPaw ratio                 | 0.583               | 0.859  | 0.968  | 0.975  | 1.007  | 1.042  | 1.025  | 0.987  | 0.996  | 0.840  | 0.916  | 0.353  | 0.191  |
| 10         | Pes at EEO (cmH <sub>2</sub> O) | 0.618               | 4.324  | 5.159  | 5.572  | 5.995  | 6.643  | 7.024  | 7.590  | 7.991  | 8.800  | 10.782 | 18.345 |        |
|            | Pes at EIO (cmH <sub>2</sub> O) | 1.709               | 6.449  | 7.456  | 8.147  | 9.079  | 10.263 | 11.130 | 12.013 | 12.433 | 13.301 | 14.999 | 20.307 |        |
|            | ΔPes/ΔPaw ratio                 | 0.244               | 0.959  | 0.983  | 0.966  | 0.985  | 1.046  | 1.019  | 0.977  | 0.970  | 1.002  | 0.984  | 0.663  | 0.280  |
| 11         | Pes at EEO (cmH <sub>2</sub> O) | 0.696               | 11.010 | 12.223 | 13.000 | 13.994 | 15.554 | 16.738 | 18.087 | 18.660 | 21.444 | 22.543 | 24.798 | 27.793 |
|            | Pes at EIO (cmH <sub>2</sub> O) | 0.854               | 13.376 | 15.155 | 16.051 | 16.719 | 18.187 | 19.105 | 19.865 | 21.024 | 22.708 | 24.232 | 26.426 | 30.266 |
|            | ΔPes/ΔPaw ratio                 | 0.046               | 0.796  | 0.904  | 1.055  | 1.053  | 1.000  | 1.036  | 0.979  | 1.006  | 1.003  | 0.977  | 0.958  | 0.690  |
| 12         | Pes at EEO (cmH <sub>2</sub> O) | -0.022              | 2.450  | 2.949  | 2.974  | 3.504  | 4.166  | 4.888  | 6.124  | 9.658  | 15.965 |        |        |        |
|            | Pes at EIO (cmH <sub>2</sub> O) | 1.105               | 4.642  | 5.403  | 5.499  | 6.024  | 6.543  | 7.186  | 8.042  | 10.945 | 15.728 |        |        |        |
|            | ΔPes/ΔPaw ratio                 | 0.379               | 0.792  | 0.988  | 0.847  | 0.818  | 0.833  | 0.900  | 1.000  | 0.872  | 0.759  |        |        |        |
| 13         | Pes at EEO (cmH <sub>2</sub> O) | 0.457               | 3.874  | 4.267  | 4.805  | 4.908  | 5.300  | 5.834  | 6.908  | 8.728  | 11.862 | 17.720 |        |        |
|            | Pes at EIO (cmH <sub>2</sub> O) | 1.260               | 6.062  | 6.953  | 7.203  | 7.481  | 8.040  | 8.442  | 9.338  | 10.636 | 12.890 | 17.754 |        |        |
|            | ΔPes/ΔPaw ratio                 | 0.257               | 1.049  | 0.837  | 0.836  | 0.861  | 0.952  | 0.812  | 0.832  | 0.993  | 0.885  | 0.696  |        |        |
| 14         | Pes at EEO (cmH <sub>2</sub> O) | 0.814               | 5.475  | 6.106  | 6.870  | 7.163  | 7.476  | 7.530  | 8.125  | 9.211  | 11.560 | 16.188 |        |        |
|            | Pes at EIO (cmH <sub>2</sub> O) | 1.175               | 7.092  | 8.176  | 9.169  | 9.447  | 9.634  | 9.816  | 10.797 | 11.922 | 13.955 | 17.628 |        |        |
|            | ΔPes/ΔPaw ratio                 | 0.110               | 0.505  | 0.626  | 0.846  | 0.832  | 0.855  | 0.879  | 0.914  | 0.969  | 1.045  | 1.137  |        |        |

| Patient No | Parameters                      | Balloon volume (ml) |        |        |        |        |        |        |        |        |        |        |        |        |
|------------|---------------------------------|---------------------|--------|--------|--------|--------|--------|--------|--------|--------|--------|--------|--------|--------|
|            |                                 | 0.0                 | 0.2    | 0.4    | 0.6    | 0.8    | 1.0    | 1.2    | 1.4    | 1.6    | 1.8    | 2.0    | 2.2    | 2.4    |
| 15         | Pes at EEO (cmH <sub>2</sub> O) | 0.640               | 6.533  | 7.507  | 8.156  | 9.265  | 9.814  | 10.992 | 11.893 | 13.640 | 16.535 |        |        |        |
|            | Pes at EIO (cmH <sub>2</sub> O) | 0.942               | 7.779  | 9.281  | 10.354 | 11.097 | 11.468 | 12.372 | 13.125 | 14.482 | 16.841 |        |        |        |
|            | ΔPes/ΔPaw ratio                 | 0.166               | 0.909  | 0.909  | 0.919  | 0.976  | 0.952  | 0.938  | 0.993  | 0.894  | 0.684  |        |        |        |
| 16         | Pes at EEO (cmH <sub>2</sub> O) | 1.703               | 7.797  | 8.222  | 8.382  | 9.114  | 9.611  | 10.126 | 11.546 | 13.062 | 15.202 | 20.253 |        |        |
|            | Pes at EIO (cmH <sub>2</sub> O) | 1.965               | 9.152  | 10.076 | 10.283 | 11.168 | 12.080 | 12.542 | 13.573 | 14.800 | 16.590 | 20.379 |        |        |
|            | ΔPes/ΔPaw ratio                 | 0.072               | 0.828  | 0.976  | 0.897  | 0.867  | 0.898  | 0.948  | 0.916  | 0.788  | 0.674  | 0.516  |        |        |
| 17         | Pes at EEO (cmH <sub>2</sub> O) | 1.130               | 6.558  | 7.320  | 7.893  | 8.843  | 9.087  | 10.140 | 11.378 | 12.890 | 20.439 |        |        |        |
|            | Pes at EIO (cmH <sub>2</sub> O) | 1.367               | 7.620  | 8.346  | 9.643  | 10.600 | 10.685 | 11.833 | 12.711 | 14.200 | 20.612 |        |        |        |
|            | ΔPes/ΔPaw ratio                 | 0.078               | 0.903  | 0.869  | 0.903  | 0.939  | 0.943  | 0.940  | 0.944  | 0.897  | 0.660  |        |        |        |
| 18         | Pes at EEO (cmH <sub>2</sub> O) | 1.634               | 5.979  | 7.216  | 8.241  | 9.175  | 9.028  | 9.810  | 10.791 | 12.010 | 15.932 | 20.670 |        |        |
|            | Pes at EIO (cmH <sub>2</sub> O) | 1.908               | 6.945  | 8.667  | 9.736  | 11.222 | 11.132 | 11.487 | 12.605 | 13.910 | 16.616 | 20.613 |        |        |
|            | ΔPes/ΔPaw ratio                 | 0.146               | 0.804  | 0.943  | 0.983  | 0.995  | 1.020  | 1.048  | 0.937  | 0.928  | 0.803  | 0.564  |        |        |
| 19         | Pes at EEO (cmH <sub>2</sub> O) | 2.877               | 7.774  | 8.593  | 9.002  | 9.949  | 10.174 | 10.797 | 11.585 | 12.878 | 15.620 | 20.175 |        |        |
|            | Pes at EIO (cmH <sub>2</sub> O) | 3.253               | 10.128 | 10.690 | 11.749 | 13.276 | 13.221 | 13.965 | 14.540 | 15.613 | 17.819 | 21.915 |        |        |
|            | ΔPes/ΔPaw ratio                 | 0.280               | 0.768  | 0.903  | 1.031  | 1.023  | 0.977  | 1.019  | 0.967  | 0.915  | 0.824  | 0.614  |        |        |
| 20         | Pes at EEO (cmH <sub>2</sub> O) | -0.389              | 1.111  | 1.802  | 2.594  | 3.861  | 4.973  | 4.980  | 5.683  | 6.844  | 7.851  | 8.215  | 12.410 |        |
|            | Pes at EIO (cmH <sub>2</sub> O) | 1.273               | 3.040  | 4.009  | 4.742  | 5.800  | 6.839  | 6.948  | 7.770  | 8.645  | 9.339  | 10.113 | 13.885 |        |
|            | ΔPes/ΔPaw ratio                 | 0.624               | 0.743  | 0.828  | 0.838  | 0.846  | 0.973  | 0.953  | 0.949  | 0.962  | 1.168  | 1.022  | 1.041  |        |
| 21         | Pes at EEO (cmH <sub>2</sub> O) | 0.360               | 2.980  | 4.212  | 5.134  | 5.400  | 6.220  | 7.296  | 7.865  | 9.517  | 12.220 | 20.246 |        |        |
|            | Pes at EIO (cmH <sub>2</sub> O) | 1.150               | 4.782  | 5.937  | 6.987  | 7.263  | 8.194  | 9.183  | 10.059 | 11.857 | 14.441 | 21.952 |        |        |
|            | ΔPes/ΔPaw ratio                 | 0.300               | 0.779  | 0.881  | 0.959  | 0.870  | 1.070  | 1.135  | 1.163  | 1.145  | 1.130  | 0.865  | 0.456  |        |
| 22         | Pes at EEO (cmH <sub>2</sub> O) | 0.184               | 2.669  | 3.424  | 3.439  | 3.680  | 4.015  | 4.877  | 5.961  | 6.365  | 7.265  | 9.124  | 14.790 |        |
|            | Pes at EIO (cmH <sub>2</sub> O) | 1.425               | 4.351  | 5.272  | 5.434  | 5.874  | 6.239  | 6.824  | 7.911  | 8.284  | 9.450  | 11.079 | 15.779 |        |
|            | ΔPes/ΔPaw ratio                 | 0.633               | 0.802  | 0.890  | 0.877  | 1.000  | 1.078  | 1.138  | 1.113  | 1.163  | 1.228  | 0.680  |        |        |
| 23         | Pes at EEO (cmH <sub>2</sub> O) | 0.189               | 4.308  | 5.121  | 5.703  | 5.906  | 6.074  | 6.386  | 6.650  | 7.435  | 8.368  | 10.481 | 14.843 |        |
|            | Pes at EIO (cmH <sub>2</sub> O) | 0.577               | 5.900  | 6.856  | 7.417  | 7.606  | 7.962  | 8.263  | 8.645  | 9.297  | 10.593 | 12.886 | 16.987 |        |
|            | ΔPes/ΔPaw ratio                 | 0.216               | 0.748  | 0.862  | 0.882  | 0.997  | 1.032  | 1.031  | 1.080  | 1.172  | 1.318  | 0.582  |        |        |
| 24         | Pes at EEO (cmH <sub>2</sub> O) | 0.343               | 2.062  | 2.884  | 3.451  | 4.208  | 5.089  | 5.808  | 6.135  | 6.383  | 7.449  | 9.330  | 13.686 |        |
|            | Pes at EIO (cmH <sub>2</sub> O) | 1.534               | 4.160  | 5.057  | 5.675  | 6.232  | 7.020  | 7.805  | 7.977  | 8.481  | 9.669  | 11.134 | 15.041 |        |
|            | ΔPes/ΔPaw ratio                 | 0.524               | 0.824  | 0.758  | 0.920  | 0.913  | 1.056  | 1.010  | 1.009  | 1.143  | 1.098  | 1.218  | 1.097  |        |
| 25         | Pes at EEO (cmH <sub>2</sub> O) | 0.688               | 4.767  | 5.749  | 5.822  | 5.870  | 6.368  | 6.741  | 7.226  | 7.791  | 8.672  | 9.936  | 12.947 |        |
|            | Pes at EIO (cmH <sub>2</sub> O) | 1.077               | 6.374  | 7.481  | 7.561  | 8.100  | 8.549  | 8.865  | 9.353  | 10.266 | 11.228 | 12.966 | 16.306 |        |
|            | ΔPes/ΔPaw ratio                 | 0.222               | 0.818  | 0.848  | 0.943  | 0.972  | 0.983  | 1.023  | 1.016  | 1.142  | 1.075  | 1.003  | 0.957  |        |
| 26         | Pes at EEO (cmH <sub>2</sub> O) | 0.490               | 9.800  | 11.140 | 12.120 | 12.670 | 13.340 | 14.490 | 15.560 | 16.150 | 16.940 | 18.220 | 20.049 |        |
|            | Pes at EIO (cmH <sub>2</sub> O) | 1.070               | 13.380 | 14.510 | 15.220 | 15.940 | 16.280 | 17.020 | 17.780 | 18.300 | 18.840 | 20.390 | 22.040 |        |
|            | ΔPes/ΔPaw ratio                 | 0.121               | 0.518  | 0.967  | 0.746  | 0.833  | 1.007  | 1.215  | 1.245  | 1.299  | 1.076  | 0.915  | 0.959  |        |
| 27         | Pes at EEO (cmH <sub>2</sub> O) | 0.210               | 9.640  | 10.990 | 12.200 | 12.870 | 13.780 | 14.690 | 15.340 | 16.500 | 17.480 | 18.940 | 21.440 | 25.984 |
|            | Pes at EIO (cmH <sub>2</sub> O) | 0.740               | 13.170 | 14.480 | 15.420 | 16.220 | 16.700 | 17.110 | 17.700 | 18.430 | 19.490 | 20.620 | 22.580 | 26.370 |
|            | ΔPes/ΔPaw ratio                 | 0.150               | 0.690  | 0.827  | 1.178  | 0.997  | 1.089  | 1.153  | 1.494  | 1.474  | 1.569  | 1.163  | 0.869  | 0.823  |
| 28         | Pes at EEO (cmH <sub>2</sub> O) | 0.700               | 9.850  | 11.450 | 12.080 | 12.740 | 13.500 | 14.310 | 15.680 | 16.280 | 17.060 | 18.320 | 20.660 |        |
|            | Pes at EIO (cmH <sub>2</sub> O) | 1.290               | 13.220 | 14.900 | 15.290 | 16.110 | 16.620 | 17.050 | 17.570 | 18.400 | 19.120 | 20.240 | 22.150 |        |
|            | ΔPes/ΔPaw ratio                 | 0.778               | 0.789  | 0.837  | 0.982  | 0.905  | 1.030  | 1.315  | 1.368  | 1.405  | 1.270  | 1.115  | 0.733  |        |

| Patient No | Parameters                      | Balloon volume (ml) |        |        |        |        |        |        |        |        |        |        |        |        |
|------------|---------------------------------|---------------------|--------|--------|--------|--------|--------|--------|--------|--------|--------|--------|--------|--------|
|            |                                 | 0.0                 | 0.2    | 0.4    | 0.6    | 0.8    | 1.0    | 1.2    | 1.4    | 1.6    | 1.8    | 2.0    | 2.2    | 2.4    |
| 29         | Pes at EEO (cmH <sub>2</sub> O) | 0.130               | 9.760  | 11.520 | 12.150 | 13.080 | 14.080 | 14.930 | 15.770 | 16.360 | 17.380 | 18.590 | 20.720 | 25.910 |
|            | Pes at EIO (cmH <sub>2</sub> O) | 0.570               | 13.120 | 14.900 | 15.820 | 16.150 | 17.030 | 17.420 | 18.340 | 18.800 | 19.350 | 20.550 | 22.360 | 26.270 |
|            | ΔPes/ΔPaw ratio                 | 0.070               | 0.706  | 0.783  | 0.728  | 0.967  | 0.934  | 1.352  | 1.333  | 1.194  | 1.100  | 0.658  | 1.187  | 0.835  |
| 30         | Pes at EEO (cmH <sub>2</sub> O) | 1.090               | 10.520 | 11.310 | 12.560 | 13.250 | 14.050 | 14.750 | 15.500 | 16.240 | 17.080 | 17.910 | 19.000 | 23.120 |
|            | Pes at EIO (cmH <sub>2</sub> O) | 1.740               | 13.430 | 14.660 | 15.770 | 16.690 | 16.940 | 17.120 | 17.960 | 18.960 | 19.610 | 20.050 | 21.200 | 24.490 |
|            | ΔPes/ΔPaw ratio                 | 0.094               | 0.746  | 0.806  | 0.871  | 0.905  | 0.837  | 0.825  | 1.007  | 1.264  | 1.171  | 1.230  | 0.963  | 0.757  |
| 31         | Pes at EEO (cmH <sub>2</sub> O) | 0.520               | 8.360  | 10.390 | 11.650 | 12.050 | 12.420 | 13.120 | 13.730 | 14.000 | 14.960 | 16.800 | 20.100 | 25.930 |
|            | Pes at EIO (cmH <sub>2</sub> O) | 1.100               | 11.080 | 13.860 | 15.000 | 15.560 | 15.840 | 16.400 | 17.270 | 17.720 | 18.240 | 20.120 | 23.320 | 27.670 |
|            | ΔPes/ΔPaw ratio                 | 0.092               | 0.540  | 0.785  | 0.820  | 0.913  | 0.809  | 0.864  | 0.955  | 0.833  | 0.894  | 0.782  | 0.747  | 0.593  |
| 32         | Pes at EEO (cmH <sub>2</sub> O) | 0.150               | 12.930 | 14.490 | 14.960 | 15.520 | 15.980 | 16.390 | 16.830 | 17.730 | 18.680 | 20.060 | 22.570 | 26.720 |
|            | Pes at EIO (cmH <sub>2</sub> O) | 0.260               | 14.310 | 16.750 | 17.380 | 17.730 | 18.290 | 17.710 | 19.180 | 19.630 | 20.650 | 22.340 | 24.080 | 27.620 |
|            | ΔPes/ΔPaw ratio                 | 0.028               | 0.354  | 0.824  | 0.853  | 1.087  | 0.952  | 0.855  | 0.847  | 0.928  | 0.894  | 0.879  | 0.856  | 0.647  |
| 33         | Pes at EEO (cmH <sub>2</sub> O) | 0.460               | 13.430 | 14.880 | 15.090 | 15.520 | 16.270 | 16.540 | 17.230 | 18.150 | 19.230 | 20.090 | 23.140 | 27.330 |
|            | Pes at EIO (cmH <sub>2</sub> O) | 0.590               | 14.860 | 16.980 | 17.290 | 18.130 | 18.600 | 19.130 | 19.520 | 20.030 | 21.110 | 22.580 | 24.780 | 28.270 |
|            | ΔPes/ΔPaw ratio                 | 0.035               | 0.290  | 0.942  | 0.963  | 0.988  | 0.975  | 0.939  | 0.932  | 0.959  | 0.870  | 0.879  | 0.725  | 0.743  |
| 34         | Pes at EEO (cmH <sub>2</sub> O) | 0.790               | 13.580 | 15.050 | 15.570 | 16.110 | 16.600 | 17.110 | 17.760 | 18.360 | 19.460 | 20.860 | 23.070 | 27.390 |
|            | Pes at EIO (cmH <sub>2</sub> O) | 0.920               | 14.820 | 17.380 | 17.750 | 18.170 | 19.030 | 19.440 | 20.110 | 20.600 | 21.770 | 22.560 | 24.950 | 28.490 |
|            | ΔPes/ΔPaw ratio                 | 0.039               | 0.303  | 0.869  | 0.943  | 0.984  | 1.004  | 0.934  | 0.981  | 0.868  | 0.885  | 0.863  | 0.845  | 0.680  |
| 35         | Pes at EEO (cmH <sub>2</sub> O) | 0.600               | 13.260 | 14.860 | 15.330 | 15.740 | 16.050 | 16.710 | 17.630 | 18.440 | 19.480 | 20.830 | 23.350 | 27.600 |
|            | Pes at EIO (cmH <sub>2</sub> O) | 0.730               | 14.490 | 17.350 | 17.290 | 18.100 | 18.590 | 19.140 | 19.690 | 20.590 | 21.340 | 22.620 | 24.780 | 28.570 |
|            | ΔPes/ΔPaw ratio                 | 0.081               | 0.305  | 0.813  | 0.874  | 0.902  | 0.929  | 0.940  | 1.016  | 0.932  | 0.942  | 0.803  | 0.829  | 0.717  |
| 36         | Pes at EEO (cmH <sub>2</sub> O) | 0.260               | 11.510 | 13.440 | 14.690 | 15.510 | 16.170 | 16.830 | 17.860 | 19.130 | 20.710 | 22.830 | 25.370 |        |
|            | Pes at EIO (cmH <sub>2</sub> O) | 0.430               | 14.620 | 17.200 | 17.940 | 18.250 | 18.570 | 19.350 | 19.970 | 21.060 | 22.130 | 23.720 | 26.160 |        |
|            | ΔPes/ΔPaw ratio                 | 0.056               | 0.695  | 1.252  | 1.235  | 1.171  | 1.156  | 1.196  | 1.005  | 1.069  | 1.125  | 0.944  | 0.856  |        |
| 37         | Pes at EEO (cmH <sub>2</sub> O) | 0.440               | 8.410  | 9.260  | 9.990  | 10.500 | 10.990 | 12.410 | 13.050 | 14.080 | 15.260 | 17.370 | 21.650 | 28.170 |
|            | Pes at EIO (cmH <sub>2</sub> O) | 0.950               | 10.790 | 12.100 | 13.050 | 13.660 | 14.530 | 15.450 | 16.260 | 17.050 | 18.360 | 20.490 | 23.870 | 29.280 |
|            | ΔPes/ΔPaw ratio                 | 0.113               | 0.643  | 0.774  | 0.821  | 0.809  | 0.882  | 0.887  | 0.908  | 0.837  | 0.857  | 0.778  | 0.662  | 0.442  |
| 38         | Pes at EEO (cmH <sub>2</sub> O) | 0.610               | 7.990  | 9.850  | 10.930 | 11.560 | 11.870 | 12.560 | 13.360 | 14.030 | 14.780 | 16.860 | 20.210 | 26.140 |
|            | Pes at EIO (cmH <sub>2</sub> O) | 1.200               | 10.620 | 12.800 | 14.270 | 14.900 | 15.220 | 15.750 | 16.620 | 17.090 | 17.810 | 19.900 | 22.690 | 27.950 |
|            | ΔPes/ΔPaw ratio                 | 0.108               | 0.609  | 0.680  | 0.716  | 0.837  | 0.844  | 0.819  | 0.883  | 0.873  | 0.832  | 0.782  | 0.698  | 0.525  |
| 39         | Pes at EEO (cmH <sub>2</sub> O) | 0.450               | 8.970  | 9.860  | 10.490 | 10.940 | 11.560 | 12.890 | 13.450 | 14.280 | 15.430 | 17.390 | 19.840 | 24.610 |
|            | Pes at EIO (cmH <sub>2</sub> O) | 0.830               | 11.410 | 13.240 | 13.760 | 14.430 | 15.060 | 15.980 | 16.760 | 17.640 | 18.740 | 20.450 | 22.610 | 26.640 |
|            | ΔPes/ΔPaw ratio                 | 0.065               | 0.566  | 0.761  | 0.835  | 0.860  | 0.831  | 0.845  | 0.800  | 0.950  | 0.884  | 0.874  | 0.759  | 0.560  |
| 40         | Pes at EEO (cmH <sub>2</sub> O) | 0.530               | 12.370 | 13.700 | 14.490 | 15.340 | 15.740 | 16.130 | 16.640 | 17.530 | 18.510 | 19.980 | 22.360 | 26.550 |
|            | Pes at EIO (cmH <sub>2</sub> O) | 0.680               | 14.090 | 16.330 | 16.940 | 17.550 | 18.190 | 18.650 | 19.210 | 19.700 | 20.500 | 21.590 | 23.750 | 27.280 |
|            | ΔPes/ΔPaw ratio                 | 0.042               | 0.391  | 0.841  | 0.893  | 0.968  | 0.915  | 0.875  | 0.848  | 0.911  | 0.906  | 0.931  | 0.784  | 0.684  |
