# Supplementary material for: Use of esophageal balloon pressure-volume curve analysis to determine esophageal wall elastance and calibrate raw esophageal pressure: a bench experiment and clinical study
Source: Springer Nature journal article supplement (doi:10.1186/s12871-018-0488-6), 2018-02-14
Supplement: MOESM6 [file 15465930]

**Use of esophageal balloon pressure-volume curve analysis to  
determine esophageal wall elastance and calibrate raw esophageal  
pressure: a bench experiment and clinical study**

Xiu-Mei Sun, Guang-Qiang Chen, Hua-Wei Huang, Xuan He, Yan-Lin Yang,

Zhong-Hua Shi, Ming Xu, Jian-Xin Zhou

**Additional file 6: Table S2**

**Table S2** Individual data of balloon volume and esophageal wall elastance

| No of Patient | V <sub>MIN</sub> (ml) | V <sub>MAX</sub> (ml) | V <sub>BEST</sub> (ml) | Ees by standard                   | Ees by simple                     |
|---------------|-----------------------|-----------------------|------------------------|-----------------------------------|-----------------------------------|
|               |                       |                       |                        | method<br>(cmH <sub>2</sub> O/ml) | method<br>(cmH <sub>2</sub> O/ml) |
| 1             | 0.2                   | 1.4                   | 1.4                    | 3.7                               | 3.6                               |
| 2             | 0.2                   | 1.4                   | 0.6                    | 3.7                               | 3.3                               |
| 3             | 0.2                   | 1.6                   | 1.4                    | 3.5                               | 3.9                               |
| 4             | 0.2                   | 1.6                   | 1.4                    | 1.8                               | 1.7                               |
| 5             | 0.6                   | 1.2                   | 1.0                    | 3.3                               | 3.3                               |
| 6             | 0.4                   | 1.6                   | 0.6                    | 4.5                               | 4.8                               |
| 7             | 0.2                   | 1.6                   | 1.0                    | 2.6                               | 2.8                               |
| 8             | 0.2                   | 1.4                   | 1.2                    | 1.6                               | 2.0                               |
| 9             | 0.4                   | 1.4                   | 0.8                    | 2.4                               | 1.9                               |
| 10            | 0.4                   | 1.4                   | 1.4                    | 2.5                               | 2.5                               |
| 11            | 0.2                   | 1.6                   | 0.6                    | 5.8                               | 5.6                               |
| 12            | 0.2                   | 1.4                   | 0.6                    | 2.9                               | 2.4                               |
| 13            | 0.2                   | 1.4                   | 1.0                    | 1.9                               | 2.6                               |
| 14            | 0.2                   | 1.4                   | 1.4                    | 2.0                               | 1.6                               |
| 15            | 0.2                   | 1.4                   | 0.6                    | 4.4                               | 4.7                               |
| 16            | 0.4                   | 1.4                   | 1.2                    | 2.4                               | 2.4                               |
| 17            | 0.2                   | 1.6                   | 0.8                    | 4.3                               | 4.4                               |
| 18            | 0.2                   | 1.6                   | 1.0                    | 3.8                               | 3.2                               |
| 19            | 0.2                   | 1.4                   | 1.2                    | 3.0                               | 3.2                               |
| 20            | 0.2                   | 2.0                   | 0.6                    | 4.0                               | 3.9                               |
| 21            | 0.4                   | 1.4                   | 1.4                    | 3.7                               | 3.4                               |
| 22            | 0.2                   | 1.8                   | 1.0                    | 2.8                               | 3.2                               |
| 23            | 0.6                   | 1.4                   | 1.4                    | 1.2                               | 1.2                               |
| 24            | 0.2                   | 1.6                   | 0.6                    | 3.2                               | 3.4                               |
| 25            | 0.4                   | 1.4                   | 0.8                    | 1.8                               | 1.8                               |
| 26            | 0.6                   | 2.0                   | 0.8                    | 4.4                               | 4.3                               |
| 27            | 0.6                   | 2.0                   | 0.8                    | 4.7                               | 4.2                               |
| 28            | 0.6                   | 2.0                   | 0.8                    | 4.3                               | 4.5                               |
| 29            | 0.4                   | 2.0                   | 0.6                    | 4.4                               | 4.5                               |
| 30            | 0.2                   | 2.2                   | 0.8                    | 4.1                               | 3.7                               |
| 31            | 0.6                   | 1.4                   | 1.4                    | 2.5                               | 2.6                               |
| 32            | 0.4                   | 1.4                   | 1.2                    | 2.4                               | 2.3                               |
| 33            | 0.4                   | 2.0                   | 0.8                    | 3.3                               | 2.7                               |
| 34            | 0.4                   | 1.6                   | 1.0                    | 2.7                               | 2.7                               |
| 35            | 0.4                   | 1.6                   | 1.0                    | 2.9                               | 2.9                               |
| 36            | 0.6                   | 1.4                   | 0.6                    | 3.8                               | 4.0                               |
| 37            | 0.2                   | 1.8                   | 1.0                    | 4.2                               | 3.8                               |
| 38            | 0.6                   | 1.8                   | 1.0                    | 3.2                               | 3.0                               |
| 39            | 0.2                   | 1.8                   | 1.0                    | 3.9                               | 3.7                               |
| 40            | 0.6                   | 1.8                   | 1.4                    | 3.1                               | 2.7                               |
| Median (IQR)  | 0.3 (0.2–0.4)         | 1.6 (1.4–1.8)         | 1.0 (0.8–1.2)          | 3.3 (2.5–4.1)                     | 3.2 (2.6–3.9)                     |

IQR: interquartile range, Ees: esophageal wall elastance, V<sub>MIN</sub> and V<sub>MAX</sub>: the minimal and maximal balloon volume representing the optimal filling volume with the least influence of balloon recoil pressure, V<sub>BEST</sub>: the best balloon filling volume.
