# Supplementary material for: Use of esophageal balloon pressure-volume curve analysis to determine esophageal wall elastance and calibrate raw esophageal pressure: a bench experiment and clinical study
Source: Springer Nature journal article supplement (doi:10.1186/s12871-018-0488-6), 2018-02-14
Supplement: MOESM7 [file 15465930]

**Use of esophageal balloon pressure-volume curve analysis to  
determine esophageal wall elastance and calibrate raw esophageal  
pressure: a bench experiment and clinical study**

Xiu-Mei Sun, Guang-Qiang Chen, Hua-Wei Huang, Xuan He, Yan-Lin Yang,

Zhong-Hua Shi, Ming Xu, Jian-Xin Zhou

**Additional file 7: Figure S2**

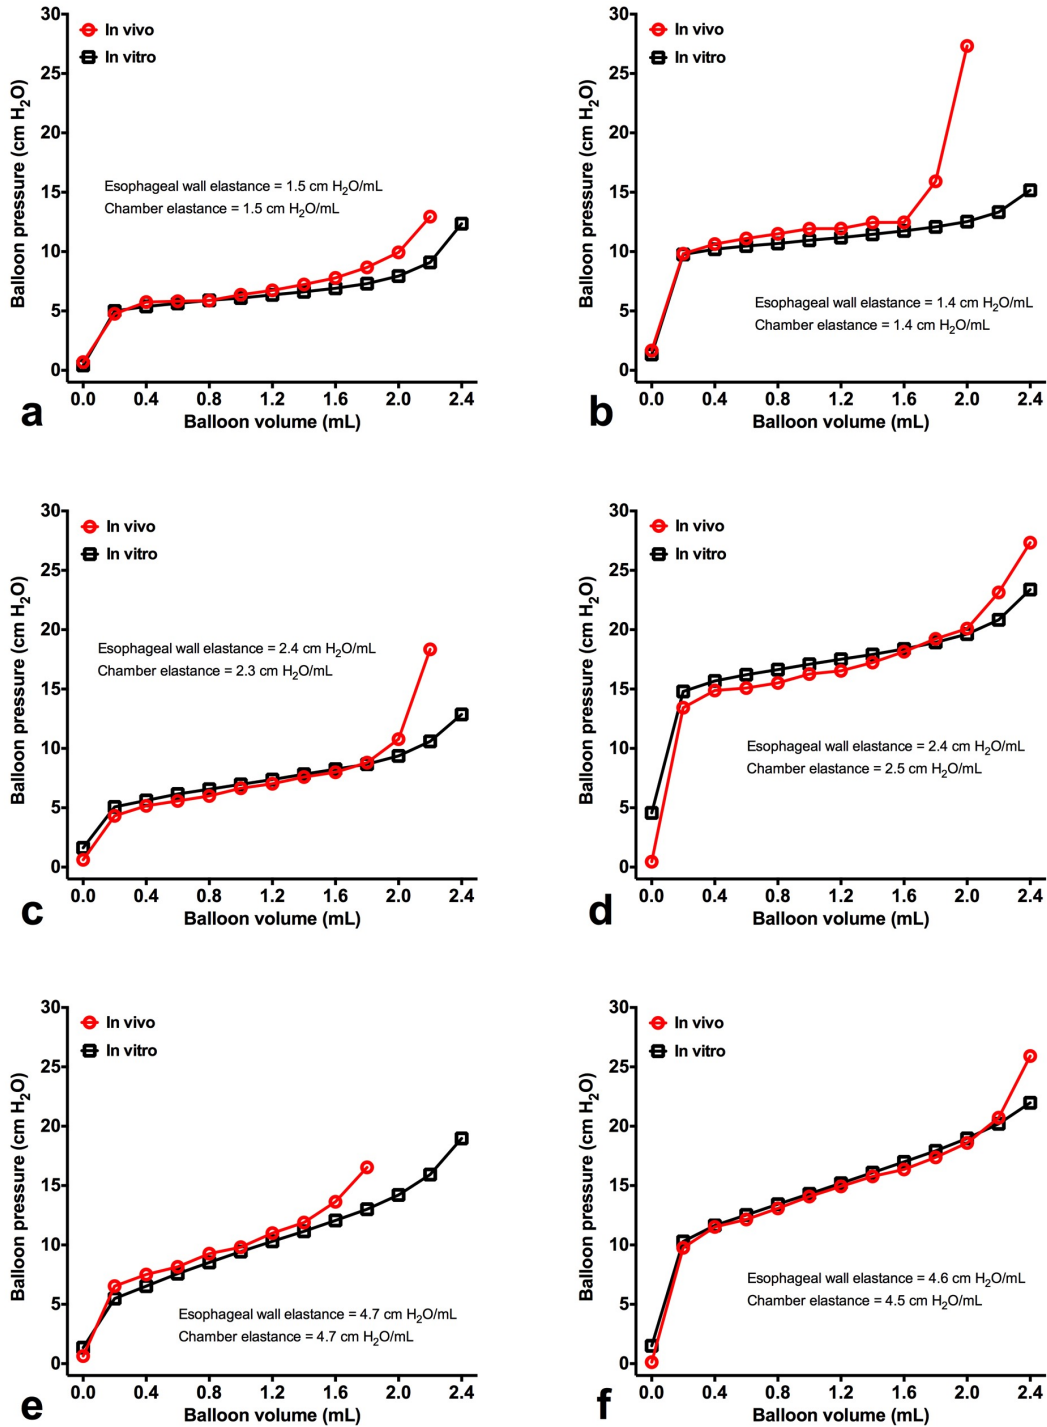

**Figure S2.** Examples of in vivo esophageal balloon pressure-volume curve (red) during end-expiratory occlusion in combination with in vitro curve (black) in chamber with comparable elastance and baseline pressure. Estimated esophageal elastance and chamber elastance are shown. Bench balloon pressure-volume curves are presented in chambers with inner volume of 1000ml at baseline pressure of 5 cmH<sub>2</sub>O (panel a) and 10 cmH<sub>2</sub>O (panel b), inner volume of 500 ml at baseline pressure of 5 cmH<sub>2</sub>O (panel c) and 15 cmH<sub>2</sub>O (panel d), and inner volume of 250 ml at baseline pressure of 10 cmH<sub>2</sub>O (panel e) and 15 cmH<sub>2</sub>O (panel f).
