# Supplementary material for: Use of esophageal balloon pressure-volume curve analysis to determine esophageal wall elastance and calibrate raw esophageal pressure: a bench experiment and clinical study
Source: Springer Nature journal article supplement (doi:10.1186/s12871-018-0488-6), 2018-02-14
Supplement: MOESM8 [file 15465930]

**Use of esophageal balloon pressure-volume curve analysis to  
determine esophageal wall elastance and calibrate raw esophageal  
pressure: a bench experiment and clinical study**

Xiu-Mei Sun, Guang-Qiang Chen, Hua-Wei Huang, Xuan He, Yan-Lin Yang,

Zhong-Hua Shi, Ming Xu, Jian-Xin Zhou

**Additional file 8: Figure S3**

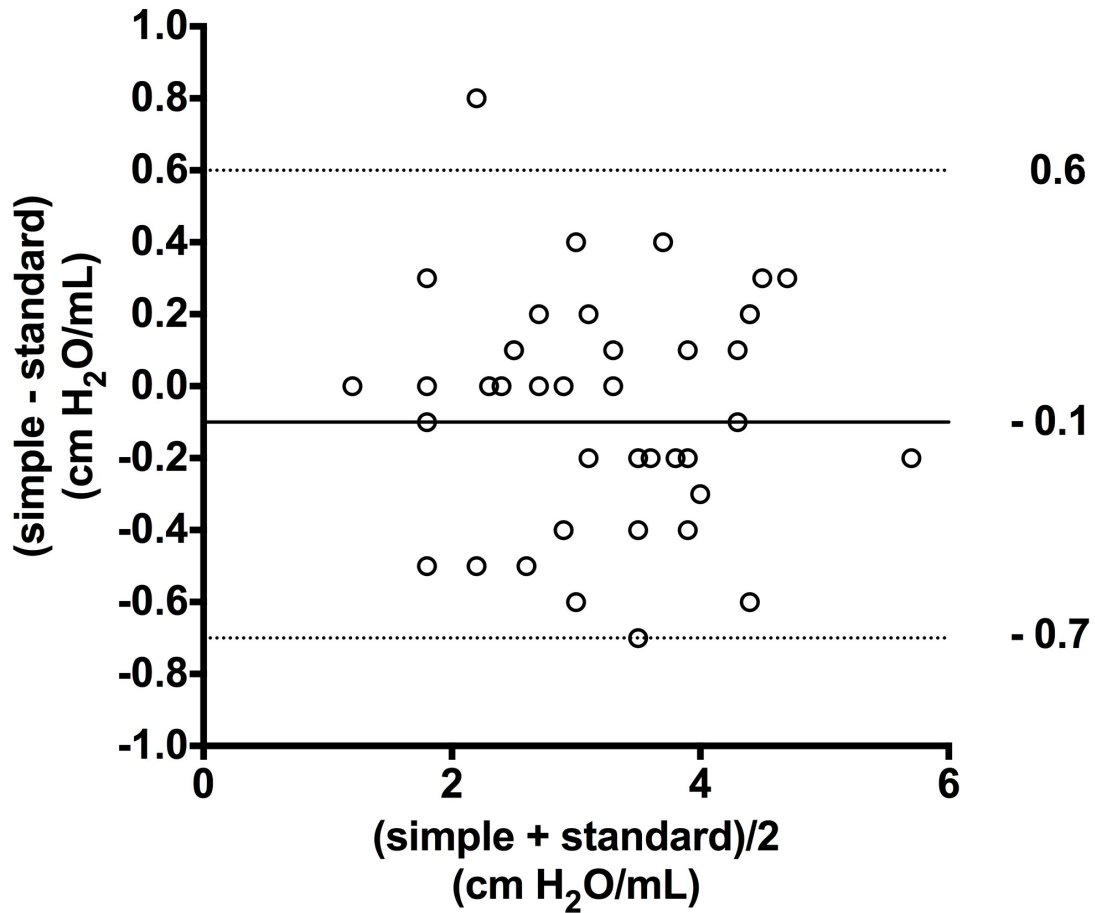

**Figure S3.** Bland-Altman's limits of agreements analysis for the estimated esophageal elastance by the simple and standard linear regression method. In the standard method, the slope of intermediate linear section on end-expiratory balloon pressure-volume was used to estimate the esophageal wall elastance. In the simple method, the esophageal wall elastance was estimated by the difference of end-expiratory balloon pressure at 0.6 ml and 1.4 ml divided by 0.8 ml. Bias (solid line) and upper and lower limits of agreements (dash lines) are shown.
